# Supplementary material for: The HPQ—Development and First Administration of a Questionnaire for Hypoparathyroid Patients
Source: PubMed Central journal article supplement (PMC6957982; doi:10.1002/jbm4.10245), 2019-11-07
Supplement: JBM4-4-e10245-s001.pdf [file JBM4-4-e10245-s001.pdf]

# HPQ 28 – Questionnaire on Hypoparathyroidism

Name/Number.: \_\_\_\_\_ Date: \_\_\_\_\_

This questionnaire contains a list of questions about symptoms and complaints that can occur in connection with parathyroid gland insufficiency (hypoparathyroidism).

Please think about each question carefully and choose the answer that best fits, ticking the respective box. Please answer every question.

| In the past 4 weeks, how much did you suffer from....?             | not at all               | somewhat                 | quite a bit              | severely                 |
|--------------------------------------------------------------------|--------------------------|--------------------------|--------------------------|--------------------------|
| 1. ...numbness or tingling sensation in certain parts of the body? | <input type="checkbox"/> | <input type="checkbox"/> | <input type="checkbox"/> | <input type="checkbox"/> |
| 2. ...memory problems                                              | <input type="checkbox"/> | <input type="checkbox"/> | <input type="checkbox"/> | <input type="checkbox"/> |
| 3. ...pain in the lower back?                                      | <input type="checkbox"/> | <input type="checkbox"/> | <input type="checkbox"/> | <input type="checkbox"/> |
| 4. ...trembling muscles?                                           | <input type="checkbox"/> | <input type="checkbox"/> | <input type="checkbox"/> | <input type="checkbox"/> |
| 5. ...heart palpitations or racing heart?                          | <input type="checkbox"/> | <input type="checkbox"/> | <input type="checkbox"/> | <input type="checkbox"/> |
| 6. ...joint pain or pain in the limbs?                             | <input type="checkbox"/> | <input type="checkbox"/> | <input type="checkbox"/> | <input type="checkbox"/> |
| 7. ...self-blame?                                                  | <input type="checkbox"/> | <input type="checkbox"/> | <input type="checkbox"/> | <input type="checkbox"/> |
| 8. ...nausea or upset stomach?                                     | <input type="checkbox"/> | <input type="checkbox"/> | <input type="checkbox"/> | <input type="checkbox"/> |
| 9. ...inner tension and restlessness?                              | <input type="checkbox"/> | <input type="checkbox"/> | <input type="checkbox"/> | <input type="checkbox"/> |
| 10. ...abdominal pain or stomach cramps?                           | <input type="checkbox"/> | <input type="checkbox"/> | <input type="checkbox"/> | <input type="checkbox"/> |
| 11. ...hot flushes or the chills?                                  | <input type="checkbox"/> | <input type="checkbox"/> | <input type="checkbox"/> | <input type="checkbox"/> |
| 12. ...muscle pain?                                                | <input type="checkbox"/> | <input type="checkbox"/> | <input type="checkbox"/> | <input type="checkbox"/> |
| 13. ...anxious thoughts?                                           | <input type="checkbox"/> | <input type="checkbox"/> | <input type="checkbox"/> | <input type="checkbox"/> |
| 14. ...neck or shoulder pain?                                      | <input type="checkbox"/> | <input type="checkbox"/> | <input type="checkbox"/> | <input type="checkbox"/> |
| 15. ...melancholia?                                                | <input type="checkbox"/> | <input type="checkbox"/> | <input type="checkbox"/> | <input type="checkbox"/> |
| 16. ... a sense of weakness?                                       | <input type="checkbox"/> | <input type="checkbox"/> | <input type="checkbox"/> | <input type="checkbox"/> |
| 17. ...dizziness or a feeling that you might faint?                | <input type="checkbox"/> | <input type="checkbox"/> | <input type="checkbox"/> | <input type="checkbox"/> |
| 18. ...difficulty making decisions?                                | <input type="checkbox"/> | <input type="checkbox"/> | <input type="checkbox"/> | <input type="checkbox"/> |
| 19. ...diarrhea?                                                   | <input type="checkbox"/> | <input type="checkbox"/> | <input type="checkbox"/> | <input type="checkbox"/> |
| 20. ...muscle cramps?                                              | <input type="checkbox"/> | <input type="checkbox"/> | <input type="checkbox"/> | <input type="checkbox"/> |

| In the past 2 weeks, how often have you been bothered by any of the following problems | not at all               | Several days             | more than half the days  | Nearly every day         |
|----------------------------------------------------------------------------------------|--------------------------|--------------------------|--------------------------|--------------------------|
| 21. Little interest or pleasure in doing things?                                       | <input type="checkbox"/> | <input type="checkbox"/> | <input type="checkbox"/> | <input type="checkbox"/> |
| 22. Feeling down, depressed or hopeless?                                               | <input type="checkbox"/> | <input type="checkbox"/> | <input type="checkbox"/> | <input type="checkbox"/> |

In the next section, we ask you some questions about your quality of life. Please note: the answer “not at all” in these questions indicates that your sense of well-being is highly impaired. The answer “strongly” thus is positive, meaning that you experienced only little or no impairment of your sense of well-being.

| In the past 4 weeks, how much have you... | not at all               | somewhat                 | quite a bit              | strongly                 |
|-------------------------------------------|--------------------------|--------------------------|--------------------------|--------------------------|
| 23. ...felt full of energy?               | <input type="checkbox"/> | <input type="checkbox"/> | <input type="checkbox"/> | <input type="checkbox"/> |
| 24. ...felt physically fit and vital?     | <input type="checkbox"/> | <input type="checkbox"/> | <input type="checkbox"/> | <input type="checkbox"/> |
| 25. ...taken pleasure in sexuality?       | <input type="checkbox"/> | <input type="checkbox"/> | <input type="checkbox"/> | <input type="checkbox"/> |
| 26. ...been calm and serene?              | <input type="checkbox"/> | <input type="checkbox"/> | <input type="checkbox"/> | <input type="checkbox"/> |
| 27. ...been happy?                        | <input type="checkbox"/> | <input type="checkbox"/> | <input type="checkbox"/> | <input type="checkbox"/> |
| 28. ...felt healthy?                      | <input type="checkbox"/> | <input type="checkbox"/> | <input type="checkbox"/> | <input type="checkbox"/> |
